# Supplementary material for: Suspended single-walled carbon nanotube fluidic sensors
Source: Royal Society of Chemistry journal article supplement (doi:10.1039/c5nr03215f), 2015-01-01
Supplement: c5nr03215f1.pdf [file c5nr03215f1.pdf]

## Supplementary Information for

# Suspended single-walled carbon nanotube fluidic sensors

B. H. Son, Ji-Yong Park, Soonil Lee, and Y. H. Ahn<sup>1</sup>

*Department of Physics and Department of Energy Systems Research, Ajou University, Suwon*

*443-749, Korea*

---

<sup>1</sup> Corresponding author. Electronic mail: [ahny@ajou.ac.kr](mailto:ahny@ajou.ac.kr)

### S1. Time traces for a suspended SWNT device at a fixed flow rate

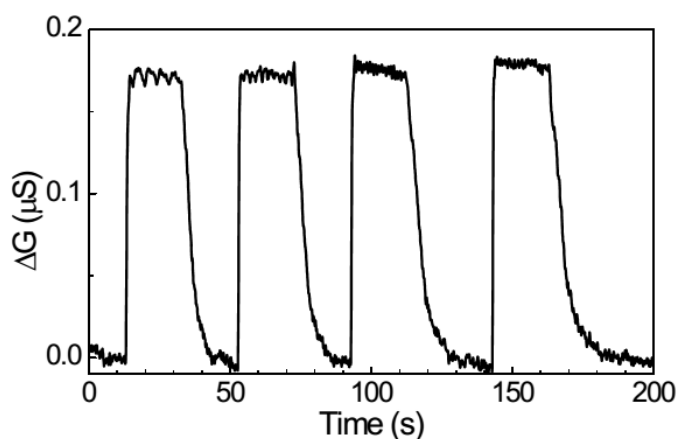

**Fig. S1** Conductance were measured for a partially suspended SWNT device at  $V_{SD} = 10$  mV and  $V_{wg} = 0$  V as a function of time with flow switched on and off at a flow rate of  $1 \mu\text{L}/\text{min}$  ( $0.42$  mm/s). The source and drain electrodes are passivated by  $\text{SiO}_2$  layers. In general, the devices with the passivated electrodes exhibit a fast time-response. The rise time (10%–90%) is measured at  $0.5$  s, whereas the decay time (90%–10%) is relatively large, yielding  $7$  s.

## S2. Upstream vs downstream for suspended SWNT device

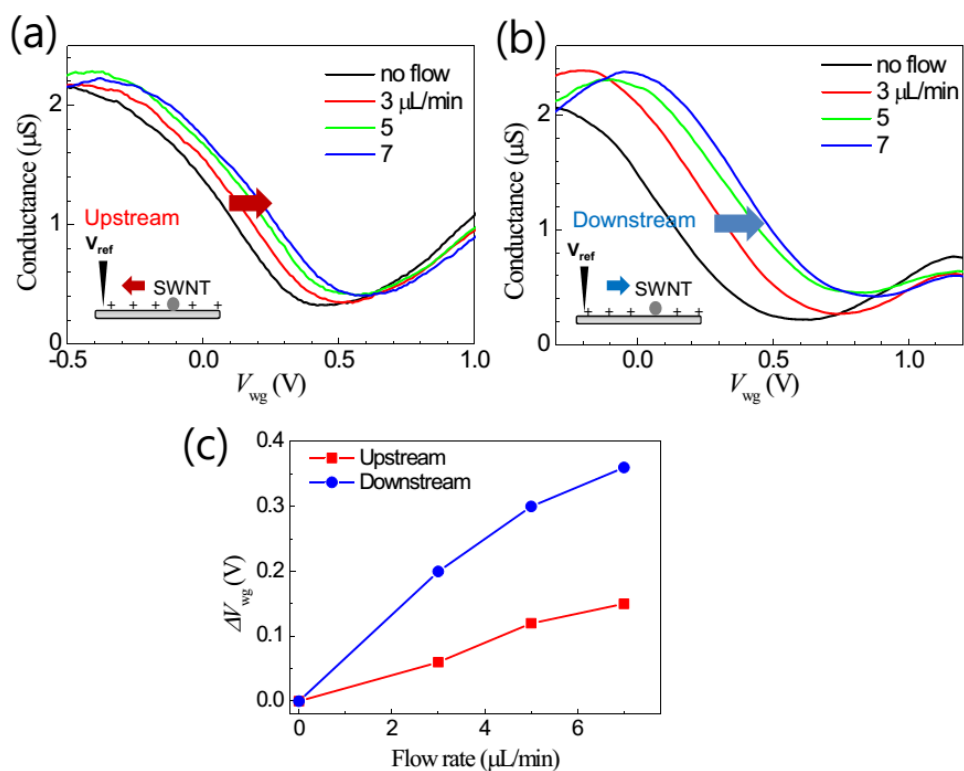

**Fig. S2** (a) DC conductance versus gate bias voltage at flow rates of 3, 5, and 7 μL/min for an upstream condition. (b) As in (a) for the downstream condition. (c) Plot of  $\Delta G$  as a function of flow rate for both upstream (squares) and downstream (circles) conditions.

### S3. Gate shift as a function of gate sweep direction

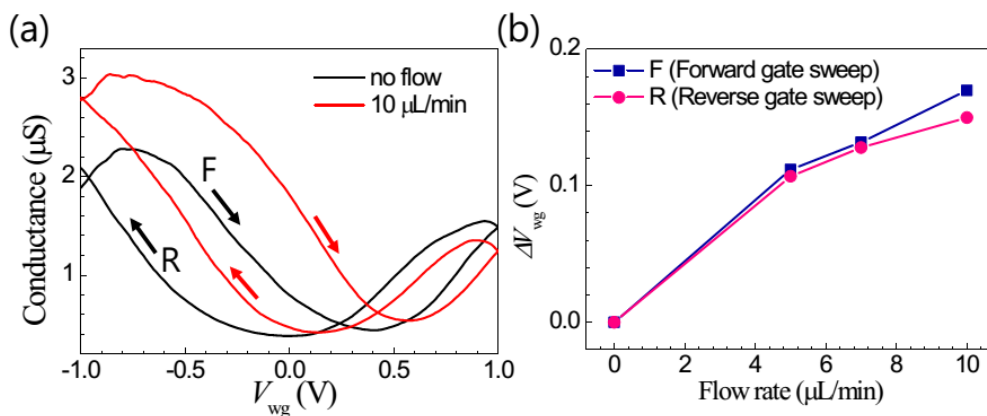

**Fig. S3** (a) Conductance as a function of  $V_{\text{wg}}$  for a partially suspended SWNT device at flow rates 0  $\mu\text{L}/\text{min}$  (black line) and 10  $\mu\text{L}/\text{min}$  (red line). The sweep speed was at 200 mV/s. F and R represent forward and reverse bias sweep directions, respectively. (b) Plot of  $\Delta V_{\text{wg}}$  as a function of flow rate for forward (squares) and reverse (circles) bias sweep directions.
